# Supplementary material
Source: MDPI journal article supplement (https://www.mdpi.com/2073-4441/9/8/560)
Supplement: s1 [file s1]

Archive with 3 entries (3 files):
- Document S3_FINAL_Admin_Municipal Drinking Water Survey.pdf
- Document S1_Minnes_GanderRural Drinking Water Project Interview Guide.pdf
- Document S2_FINAL_Water Operator Survey.pdf
